# Supplementary material for: Evaluating The Quality, Utility And Reliability of Information In Uveitis Videos Shared On YouTube
Source: Research Square preprint supplement (doi:10.21203/rs.3.rs-1139915/v1), 2021-12-13
Supplement: Supplementary file 1 [file dba8676c08718d1f0449a655.docx]

| Table 1. DISCERN Scoring System | | | | | | |
| --- | --- | --- | --- | --- | --- | --- |
| **Question Number** | **What is investigated?** | **Question Rating** | | | | |
| **No Partially** | | | **Yes** | |
| **Section 1** | Is the publication reliable? |  |  |  |  |  |
| 1 | Are the aims clear? | 1 | 2 | 3 | 4 | 5 |
| 2 | Does it achieve its aims? | 1 | 2 | 3 | 4 | 5 |
| 3 | Is it relevant? | 1 | 2 | 3 | 4 | 5 |
| 4 | Is it clear what sources of information were used to compile the publication (other than the author or producer)? | 1 | 2 | 3 | 4 | 5 |
| 5 | Is it clear when the information used or reported in the publication was produced? | 1 | 2 | 3 | 4 | 5 |
| 6 | Is it balanced and unbiased? | 1 | 2 | 3 | 4 | 5 |
| 7 | Does it provide details of additional sources of support and information? | 1 | 2 | 3 | 4 | 5 |
| 8 | Does it refer to areas of uncertainty? | 1 | 2 | 3 | 4 | 5 |
| **Section 2** | How good is the quality of information regarding treatment choices? |  |  |  |  |  |
| 9 | Does it describe how each treatment works? | 1 | 2 | 3 | 4 | 5 |
| 10 | Does it describe the benefits of each treatment? | 1 | 2 | 3 | 4 | 5 |
| 11 | Does it describe the risks of each treatment? | 1 | 2 | 3 | 4 | 5 |
| 12 | Does it describe what would happen if no treatment is used? | 1 | 2 | 3 | 4 | 5 |
| 13 | Does it describe how the treatment choices affect overall quality of life? | 1 | 2 | 3 | 4 | 5 |
| 14 | Is it clear that there may be more than 1 possible treatment choice? | 1 | 2 | 3 | 4 | 5 |
| 15 | Does it provide support for shared decision making? | 1 | 2 | 3 | 4 | 5 |
